# Supplementary material for: Where Taxonomy Based on Subtle Morphological Differences Is Perfectly Mirrored by Huge Genetic Distances: DNA Barcoding in Protura (Hexapoda)
Source: PubMed Central journal article supplement (PMC3946556; doi:10.1371/journal.pone.0090653), 2014-03-07

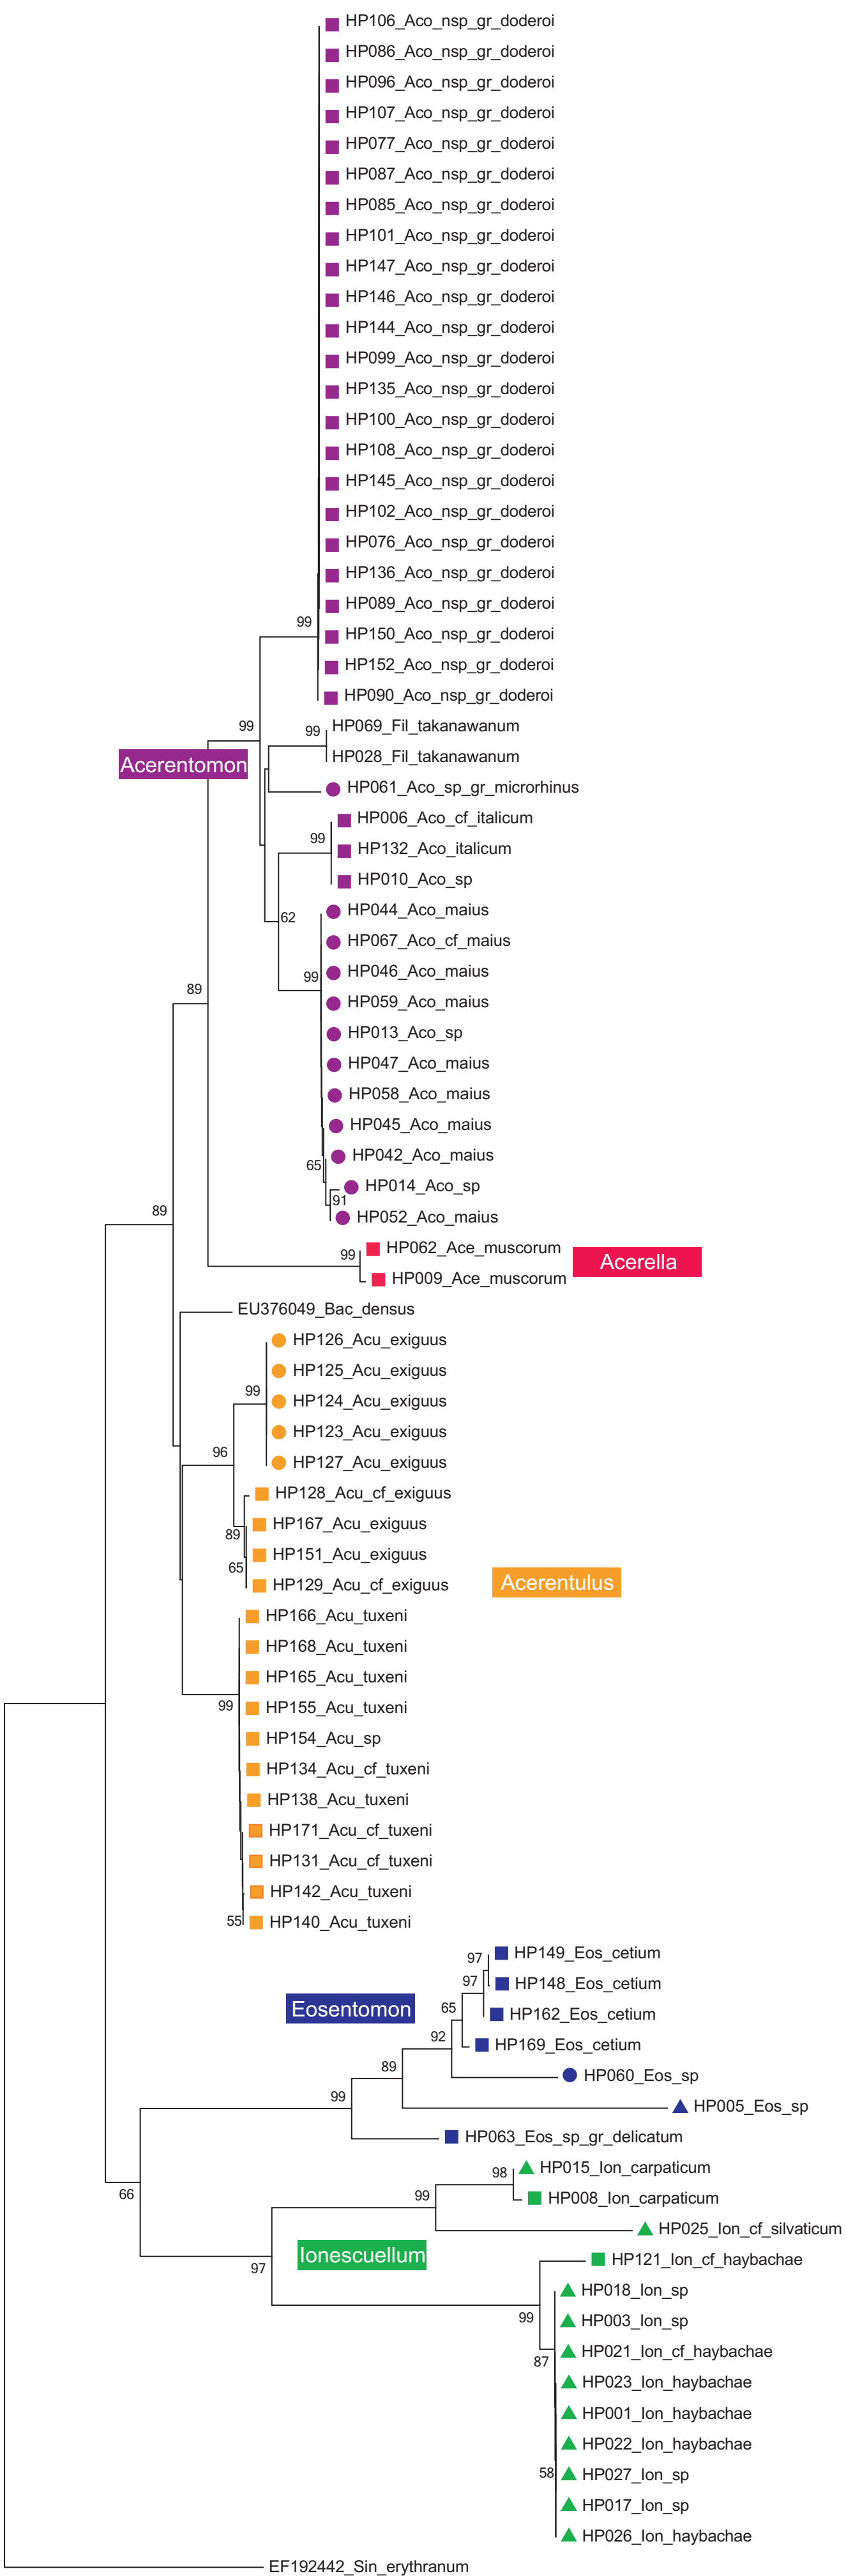

Supplement: pone.0090653.s001.pdf [file pone.0090653.s001.pdf]
